# Supplementary material
Source: Springer Nature journal article supplement (https://www.springermedizin.de/resource/supplementary/12891_2009_796_MOESM3_ESM.pdf/9507036)
Supplement: MOESM3 [file 9507036]

**Literature Search**

64 EIA Experts

**Nominations**

78 Stakeholders

**Declined Participation**

51 EIA Experts

31 Stakeholders

**Delphi Round One**

60 Respondents

**Nominations**

1 Stakeholder

**Declined Participation**

2 Stakeholders

**Delphi Round Two**

59 Respondents

**Nominations**

120 Stakeholders

**Declined Participation**

4 EIA Experts

6 Stakeholders

**Delphi Round Three**

169 Respondents
